# Supplementary material for: Highly ordered aluminium-planted mesoporous silica as active catalyst for Biginelli reaction and formyl C–H insertion reaction with diazoester
Source: Royal Society of Chemistry journal article supplement (doi:10.1039/c0cp00565g), 2010-01-01
Supplement: c0cp00565g.pdf [file c0cp00565g.pdf]

Supplementary Information for  
**Preparation of highly ordered aluminum-planted mesoporous silica  
catalyst active for Biginelli reaction and formyl C-H insertion reaction  
with diazoester**

Hiroaki Murata, Haruro Ishitani and Masakazu Iwamoto\*

Chemical Resources Laboratory, Tokyo Institute of Technology, 4259-R1-5 Nagatsuta, Midori-ku,  
Yokohama, 226-8503, Japan  
[iwamoto@res.titech.ac.jp](mailto:iwamoto@res.titech.ac.jp)

Table of Contents

|                                                                                                                 | Fig. or Table |
|-----------------------------------------------------------------------------------------------------------------|---------------|
| 1. Experimental                                                                                                 |               |
| 2. $^1\text{H}$ - and $^{13}\text{C}$ -NMR spectra of products                                                  | Figs. S1, S2  |
| 3. $\text{N}_2$ absorption isotherms of Al-MCM-41s                                                              | Figs. S3, S4  |
| 4. X-ray diffractions of Al-MCM-41s                                                                             | Figs. S5, S6  |
| 5. Typical $^{27}\text{Al}$ NMR spectra of Al-planted MCM-41s                                                   | Fig. S7       |
| 6. Correlation between catalytic activity and physicochemical properties of Al-planted MCM-41s with Si/Al=23-38 | Figs. S8-12   |
| 7. Summary of physicochemical properties and catalytic activities of individual Al-planted MCM-41s              | Table S1      |
| 8. References                                                                                                   |               |

## 1. Experimental

### General.

Unless specified, all starting materials and solvents were of purchased commercial reagents. Urea (**4a**) was recrystallized from MeOH, and the other reagents and solvents were purified by respective literature procedures. Ethyl diazoacetate (**2a**) was prepared by the reported manner.<sup>S1</sup> GC analyses were performed on an HP 6890 gas chromatograph equipped with an HP-5MS column (30 m × 0.25 mm × 0.25 μm) and an HP 5793 mass selective EI detector. High resolution mass spectra (HRMS) data were obtained on a JEOL JMS-700 spectrometer. The amounts of carbon and hydrogen were analyzed in a usual manner with a CHNS-932 system of LECO Corporation. Melting point was measured by using a DTG-60 apparatus (Shimadzu). NMR spectra were measured on an AVANCE-400 (Bruker) spectrometer. Chemical shifts of the organic compounds were quoted in ppm from internal TMS. <sup>27</sup>Al MAS NMR spectra of Al-planted MCM-41s were recorded at a frequency 104.2 MHz, a spinning rate of 12 kHz, a pulse length of 4.0 μs, a delay time of 1.0 s and 12000 scans. Al-M41s were hydrated in an air chamber saturated with water vapour at room temperature before measurement. γ-Al<sub>2</sub>O<sub>3</sub> was used as a reference of chemical shifts (3.94 ppm). Powder X-ray diffraction (XRD) patterns of catalysts were recorded on a RINT2000 diffractometer with Cu K<sub>α</sub> radiation (40 kV, 40 mA). N<sub>2</sub> sorption isotherms were obtained on a BELSORP 28SA volumetric adsorption analyzer at 77 K. An OPTIMA 3200XL ICP was used to determine the contents of metal ions in MCM-41s.

### Preparations of catalysts.

All M41s were prepared by using C<sub>12</sub>H<sub>25</sub>NMe<sub>3</sub>Br and colloidal silica (Snow Techs 20, Nissan chemical Industries, Ltd.) as the template and the silica source. Al-M41-a,<sup>S2</sup> -b,<sup>S3</sup> and -c<sup>S4</sup> were prepared by post synthesis methods in which the parent M41 was separately prepared<sup>S5</sup> and the Al sources employed were described in the respective literatures. Al-M41-d,<sup>S6</sup> -e,<sup>S7</sup> and -f<sup>S8</sup> were prepared by sol-gel methods. In preparation of Al-M41-[z], Al was planted onto the parent M41<sup>S5</sup> by the template-ion exchange (TIE) method<sup>S9</sup> with Al(NO<sub>3</sub>)<sub>3</sub>. All of the resulting materials were calcined at 873 K for 6 h in air. The catalysts were characterized by XRD, ICP, and N<sub>2</sub> absorption measurements as described above and applied for the catalytic reaction after being evacuated at 373 K for 1 h.

### Typical procedure of Biginelli reaction.

3-Oxo-hexanoic acid ethyl ester (**3b**, 1.0 mmol), *p*-tolualdehyde (**1b**, 1.0 mmol), urea (**4a**, 0.50 mmol), tetradecane (GC internal standard, 0.20 mmol), and octane (solvent, 1 mL) were added into a 40 mL test tube which contained in advance a selected amount of catalyst and a magnetic stirrer bar. The mixture was heated at 388 K under Ar atmosphere for 10 h. The reaction mixture was diluted with MeOH, and the catalyst was removed by filtration and washed with AcOEt. The filtrate was evaporated and analyzed by GC.

### 5-Pyrimidinecarboxylic acid, 1,2,3,4-tetrahydro-4-(4-methylphenyl)-2-oxo-6-propyl-, ethyl ester (**5a**)<sup>S10</sup>

White crystal. <sup>1</sup>HNMR (400 MHz, *d*<sub>6</sub>-DMSO/TMS): δ<sub>H</sub> 9.14 (br, 1H), 7.68 (br, 1H), 7.11 (d, *J* = 1.5, 4H), 5.12 (d, *J* = 3.3, 1H), 3.97 (q, *J* = 7.0, 2H), 2.63 (t, *J* = 7.3, 2H), 2.24 (s, 3H), 1.49-1.62 (m, 2H), 1.09 (t, *J* = 7.0, 3H), 0.90 (t, *J* = 7.1, 3H). <sup>13</sup>CNMR (100 MHz, *d*<sub>6</sub>-DMSO/TMS): δ<sub>C</sub> 165.56, 152.86, 152.64, 142.47, 136.83, 129.36, 126.59, 99.66, 59.66, 54.08, 32.78, 22.10, 21.10, 14.50, 14.15. HRMS(FAB) Calcd for [C<sub>17</sub>H<sub>23</sub>N<sub>2</sub>O<sub>3</sub><sup>+</sup>] 303.1709, Found 303.1701. Mp 140-144 °C

### Procedude of formyl C-H insertion reaction (Fig. 3).

Ethyl diazoacetate (**2a**, 12 mmol) was added at a stroke at 298 K to the mixture of heptanal (**1a**, 8.0 mmol), tetradecane (GC internal standard, 1.6 mmol) and Al-M41 (20 mg) in 40 ml of CH<sub>2</sub>Cl<sub>2</sub>. Progress in the reaction was traced with the periodical GC analysis.

**3-Oxo-nonanoic acid ethyl ester (3a)**<sup>S11</sup> Colorless oil. <sup>1</sup>HNMR (400 MHz, CDCl<sub>3</sub>/TMS): δ<sub>H</sub> 4.20 (q, *J* = 7.2, 2H), 3.43 (s, 2H), 2.54 (t, *J* = 7.4, 2H), 1.55-1.63 (m, 2H), 1.26-1.31 (m, 9H), 0.90 (t, *J* = 7.2, 3H). <sup>13</sup>CNMR (100 MHz, CDCl<sub>3</sub>/TMS): δ<sub>C</sub> 203.08, 167.33, 61.43, 49.33, 43.07, 31.57, 28.70, 23.42, 22.49, 14.26, 14.04. Anal. Calcd for C<sub>11</sub>H<sub>20</sub>O<sub>3</sub>: C, 65.97; H, 10.07. Found: C, 65.52; H, 9.93.

## 2. $^1\text{H}$ and $^{13}\text{C}$ NMR spectra of 5a and 3a

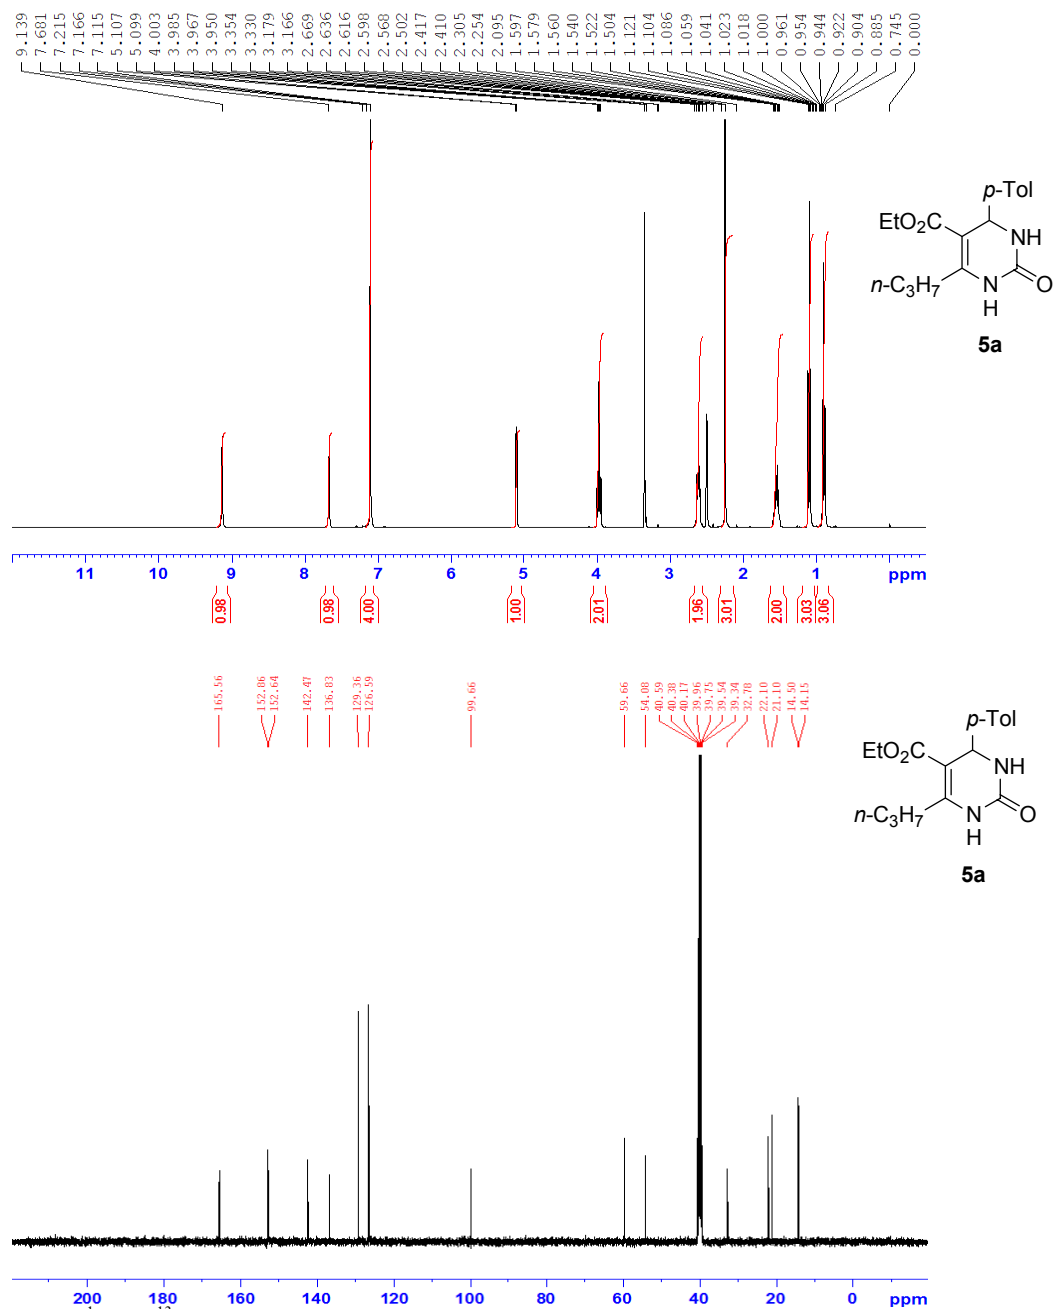

Fig. S1  $^1\text{H}$  and  $^{13}\text{C}$  NMR spectra of 5-pyrimidinecarboxylic acid, 1,2,3,4-tetrahydro -4-(4-methylphenyl)-2-oxo-6-propyl-, ethyl ester (**5a**).<sup>S10</sup>

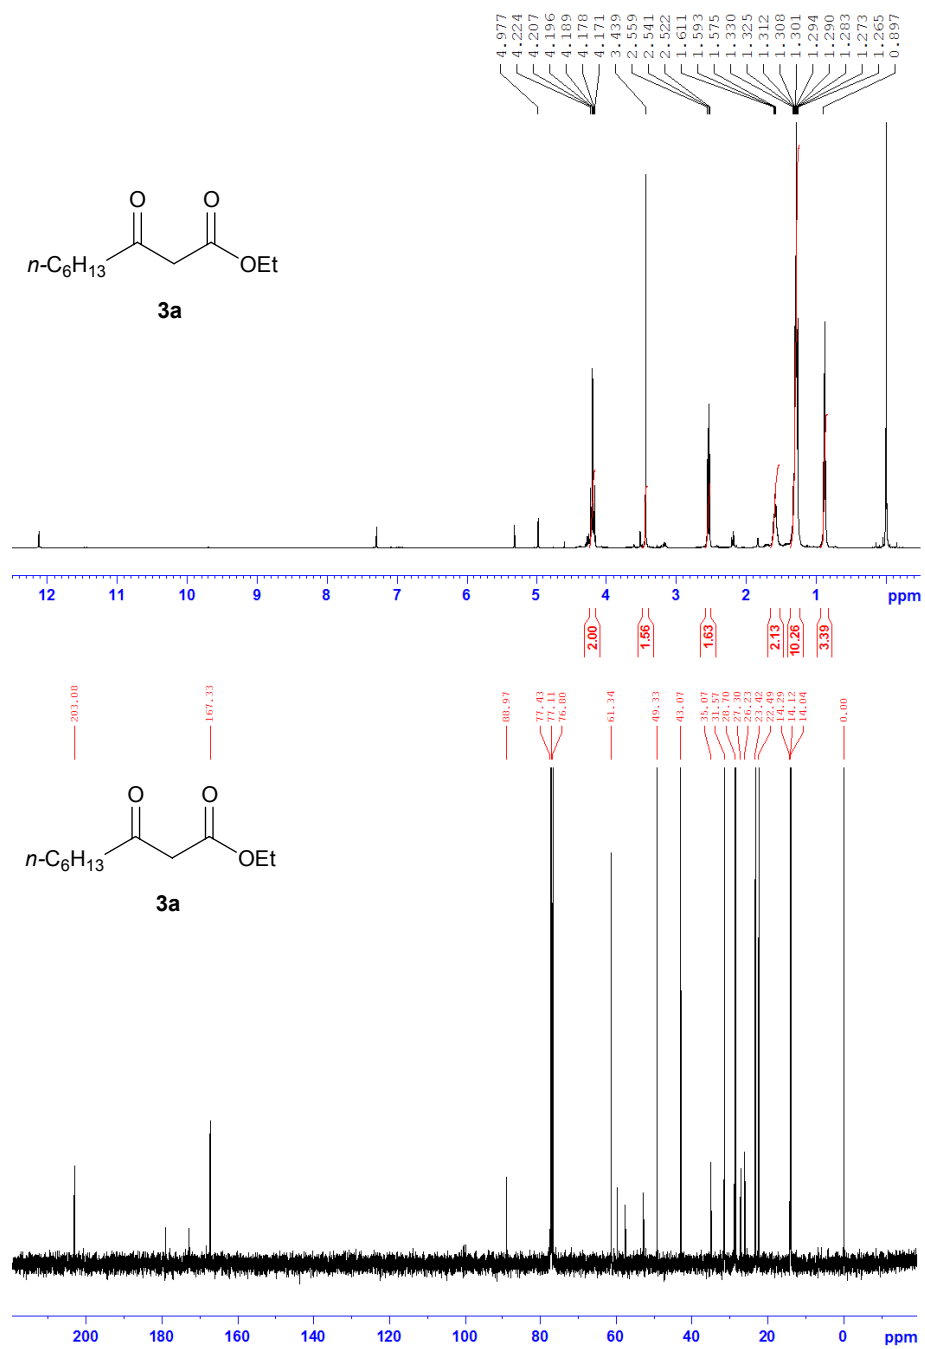

Fig. S2 <sup>1</sup>H and <sup>13</sup>C NMR spectra of 3-oxo-nonanoic acid ethyl ester (**3a**).<sup>S11</sup>

### 3. N<sub>2</sub> absorption isotherms of Al-MCM-41s

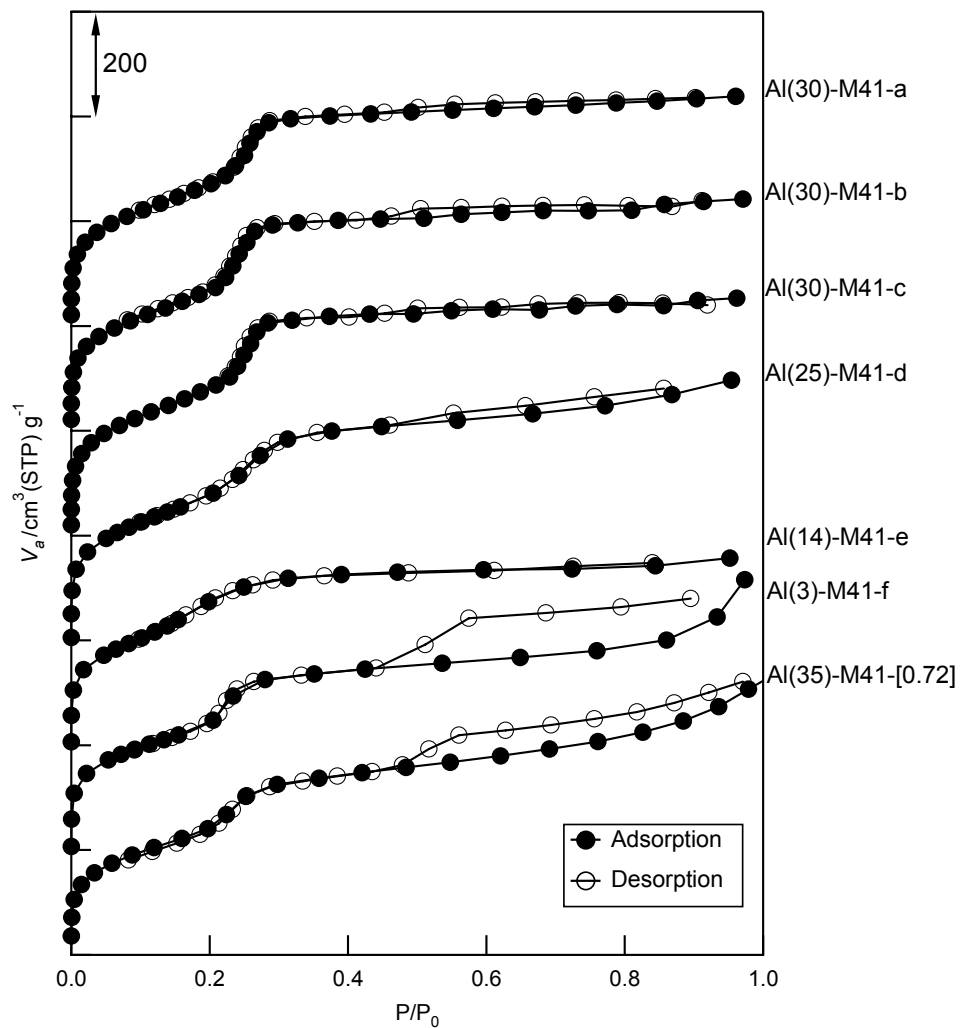

Fig. S3 N<sub>2</sub> adsorption-desorption isotherms of Al-MCM-41s (Table 1).

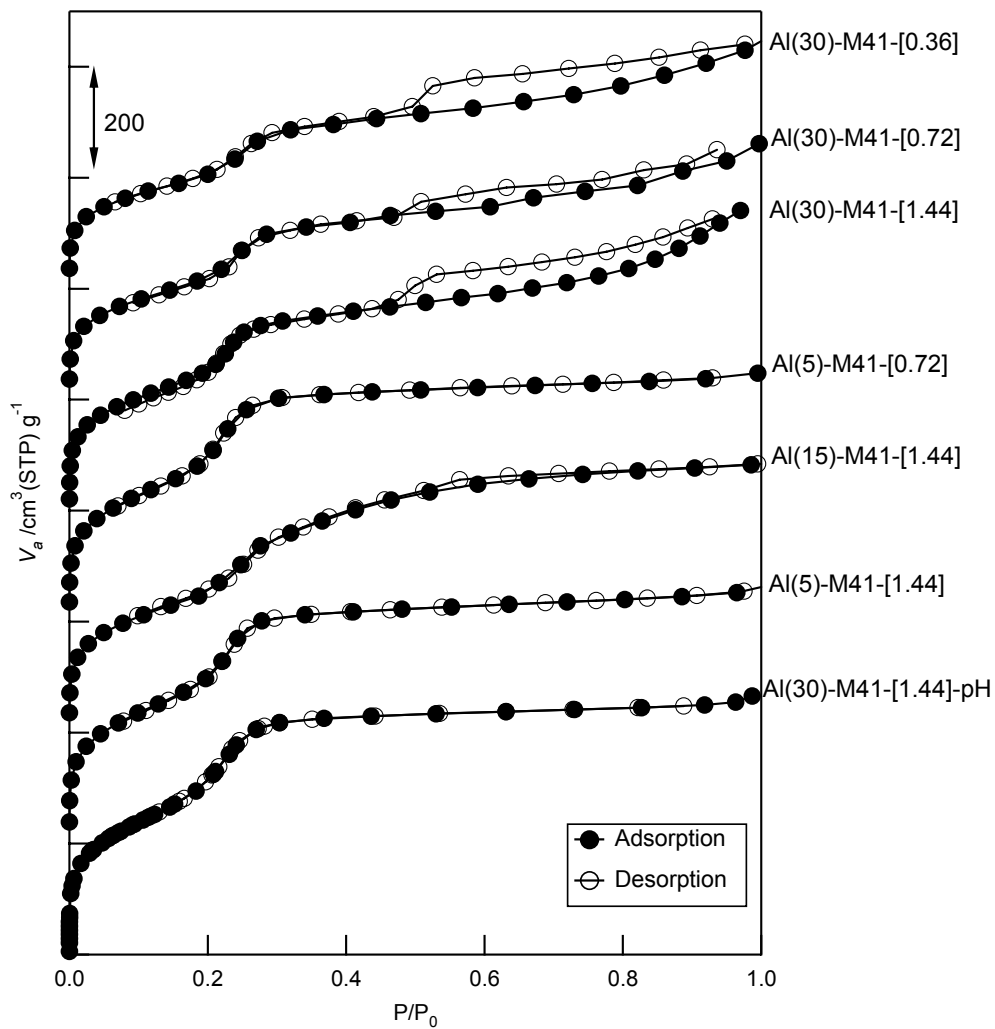

Fig. S4 N<sub>2</sub> adsorption-desorption isotherms of typical Al-MCM-41s (Table 2).

#### 4. X-ray diffractions of Al-MCM-41s

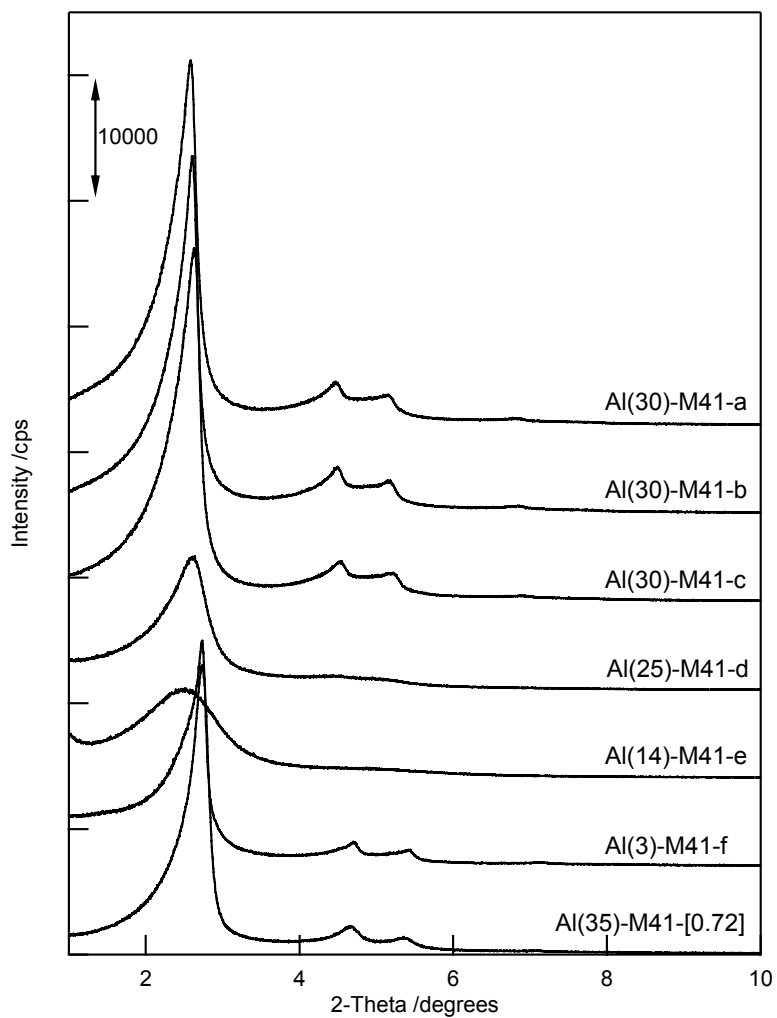

Fig. S5 X-ray diffraction patterns of Al-MCM-41s (Table 1).

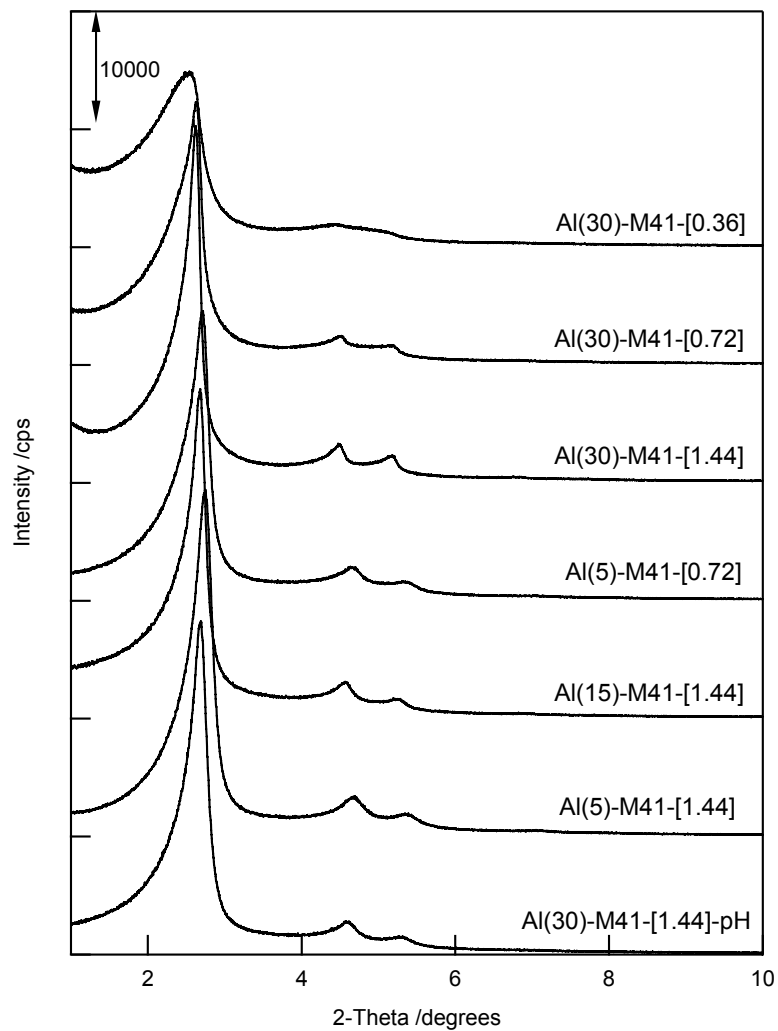

**Fig. S6** X-ray diffraction patterns of typical Al-MCM-41s (Table 2).



### 5. Typical $^{27}\text{Al}$ NMR spectra of Al-planted MCM-41s

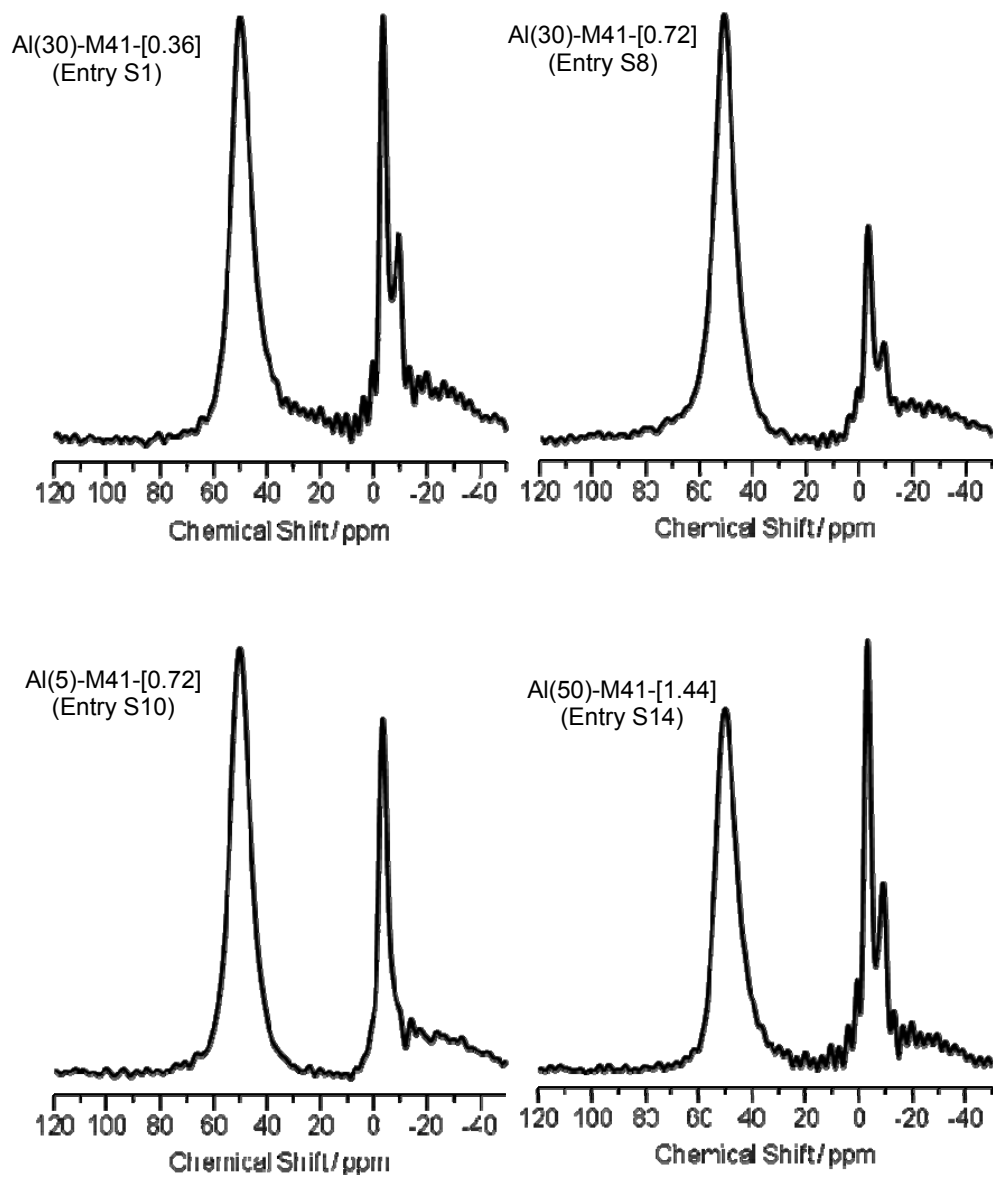

Fig. S7a Typical  $^{27}\text{Al}$  NMR spectra of Al-MCM-41s.

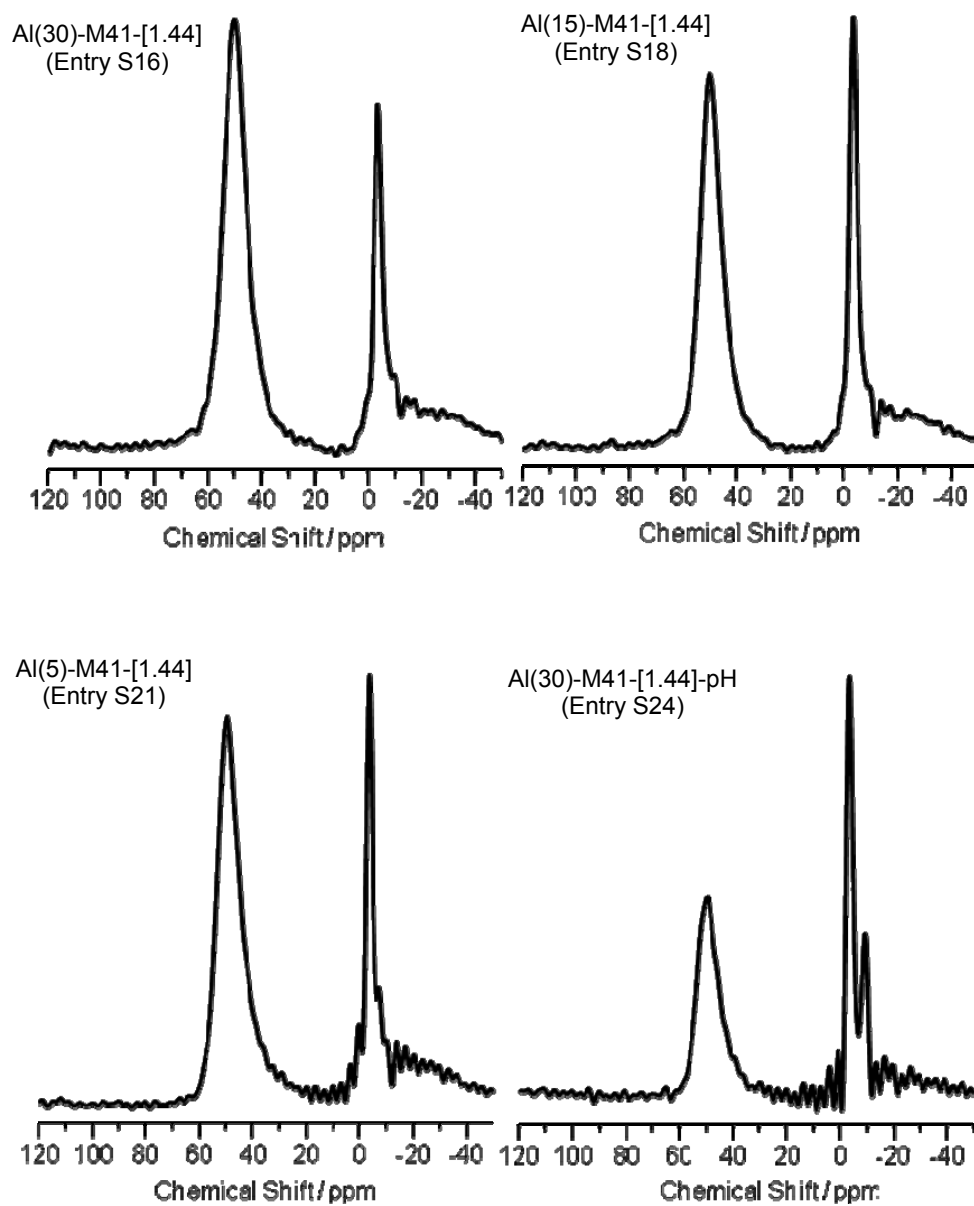

Fig. S7b Typical  $^{27}\text{Al}$  NMR spectra of Al-MCM-41s.

## 6. Correlation between catalytic activity and physicochemical properties of Al-planted MCM-41s with Si/Al=23-38

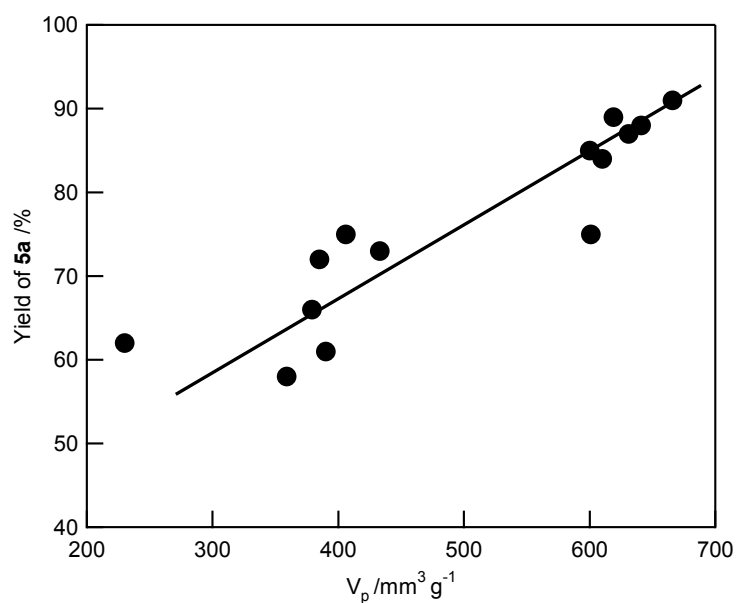

Fig. S8 Correlation between yields of 5a and mesopore volume of Al-M41s with 23-38 of Si/Al.

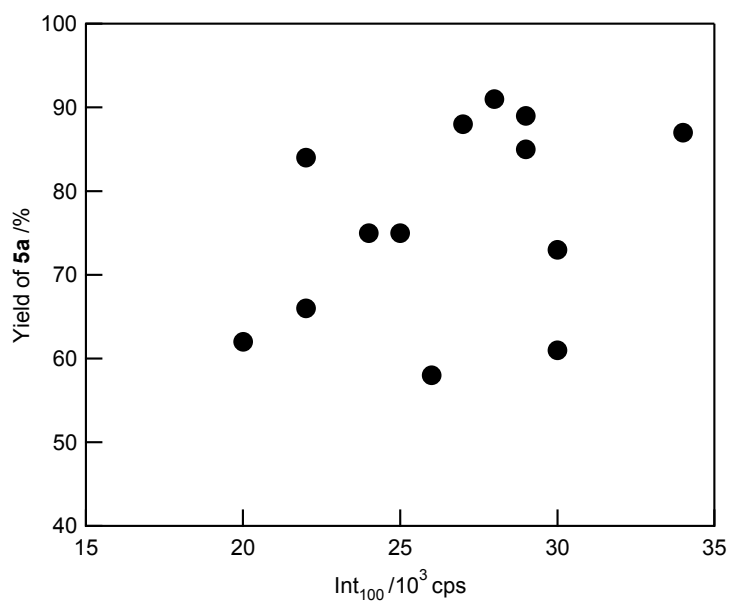

Fig. S9 Correlations between yields of 5a and peak intensity of XRD (100) of Al-M41s with 23-38 of Si/Al.

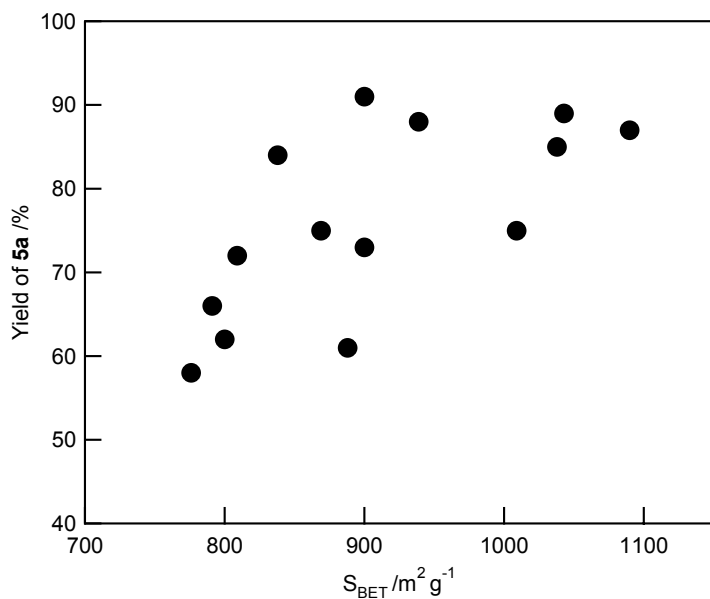

**Fig. S10** Correlations between yields of **5a** and BET surface areas of Al-M41s with 23-38 of Si/Al.

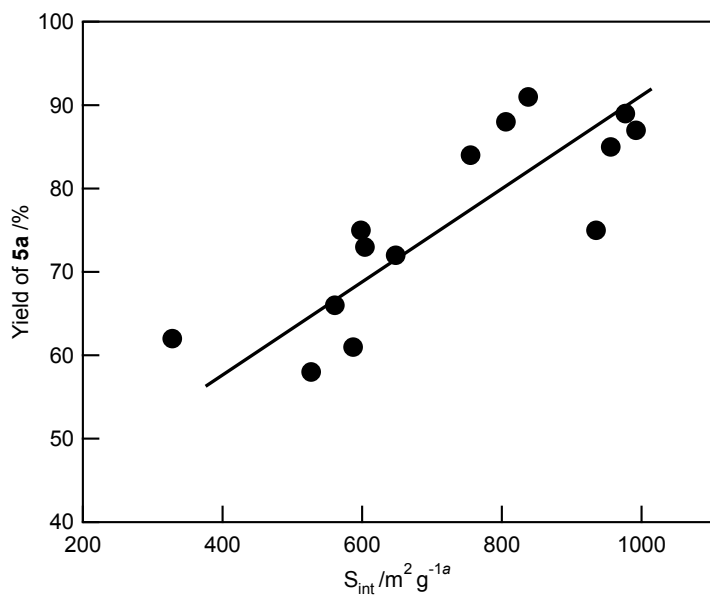

**Fig. S11** Correlations between yields of **5a** and internal surface areas of Al-M41s with 23-38 of Si/Al <sup>a</sup>Calculated from the difference between  $S_{BET}$  and extent surface area determined by t-plot method.

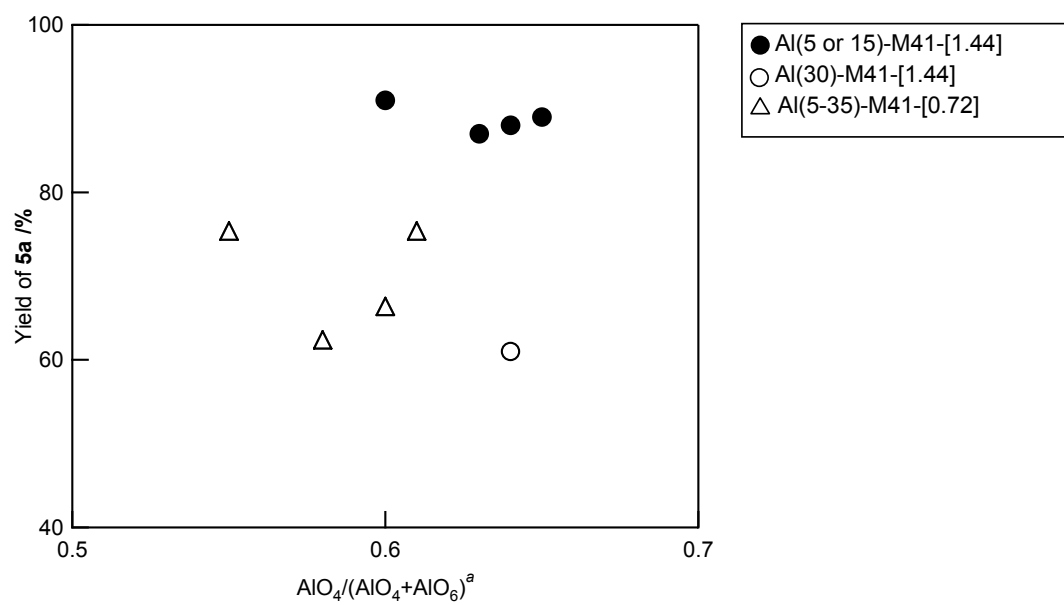

**Fig. S12** Correlations between yields of **5a** and value of  $\text{AlO}_4/(\text{AlO}_4+\text{AlO}_6)$  of Al-M41s. <sup>a</sup>Calculated from the <sup>27</sup>Al NMR spectra using the respective peak areas.

## 7. Summary of physicochemical properties and catalytic activities of individual Al-planted MCM-41s

**Table S1.** Physicochemical properties and catalytic activities of individual Al-planted MCM-41s

| Entry | Al-M41 <sup>a</sup>  | pH <sup>b</sup> | [Al]<br>/mmol<br>g <sup>-1</sup> | Si<br>/Al | S <sub>BET</sub><br>/m <sup>2</sup><br>g <sup>-1</sup> | V <sub>p</sub><br>/mm <sup>3</sup><br>g <sup>-1</sup> | S <sub>int</sub><br>/m <sup>2</sup><br>g <sup>-1c</sup> | D<br>/nm <sup>d</sup> | Int <sub>100</sub> <sup>e</sup><br>/10 <sup>3</sup> cps | GC<br>yield<br>/% <sup>f</sup> | AlO <sub>4</sub> /<br>(AlO <sub>4</sub> +<br>AlO <sub>6</sub> ) <sup>g</sup> |
|-------|----------------------|-----------------|----------------------------------|-----------|--------------------------------------------------------|-------------------------------------------------------|---------------------------------------------------------|-----------------------|---------------------------------------------------------|--------------------------------|------------------------------------------------------------------------------|
| 1     | Al(30)-M41-[0.36]    | 6.9             | 0.38                             | 30        | 731                                                    | 340                                                   | 486                                                     | 2.32                  | 15                                                      | 29                             | 0.55                                                                         |
| 2     | M41-[0.72]           | <sup>h</sup>    | 0.065                            | 237       | 1010                                                   | 616                                                   | 925                                                     | 2.12                  | 29                                                      | 53                             | 0.57                                                                         |
| 3     | Al(70)-M41-[0.72]    | 7.6             | 0.19                             | 73        | 1002                                                   | 545                                                   | 823                                                     | 2.12                  | 29                                                      | 59                             | 0.72                                                                         |
| 4     | Al(45)-M41-[0.72]    | 8.3             | 0.24                             | 45        | 919                                                    | 430                                                   | 680                                                     | 2.18                  | <sup>h</sup>                                            | 73                             | <sup>h</sup>                                                                 |
| 5     | Al(40)-M41-[0.72]    | 6.3             | 0.44                             | 44        | 904                                                    | 445                                                   | 696                                                     | 2.12                  | <sup>h</sup>                                            | 74                             | 0.75                                                                         |
| 6     | Al(35)-M41-[0.72]    | 7.7             | 0.38                             | 35        | 869                                                    | 406                                                   | 598                                                     | 2.12                  | 24                                                      | 75                             | 0.61                                                                         |
| 7     | Al(35)-M41-[0.72]    | 8.1             | 0.40                             | 33        | 809                                                    | 385                                                   | 648                                                     | 2.12                  | <sup>h</sup>                                            | 72                             | <sup>h</sup>                                                                 |
| 8     | Al(30)-M41-[0.72]    | 7.3             | 0.44                             | 30        | 791                                                    | 379                                                   | 561                                                     | 2.02                  | 22                                                      | 66                             | 0.60                                                                         |
| 9     | Al(20)-M41-[0.72]    | 5.8             | 0.58                             | 23        | 800                                                    | 230                                                   | 328                                                     | 2.12                  | 20                                                      | 62                             | 0.62                                                                         |
| 10    | Al(5)-M41-[0.72]     | 3.2             | 0.32                             | 38        | 1009                                                   | 601                                                   | 935                                                     | 2.18                  | 25                                                      | 75                             | 0.55                                                                         |
| 11    | M41-[1.44]           | <sup>h</sup>    | 0.069                            | 200       | 978                                                    | 592                                                   | 893                                                     | 2.32                  | 34                                                      | 49                             | 0.58                                                                         |
| 12    | Al(100)-M41-[1.44]   | 9.5             | 0.16                             | 80        | 852                                                    | 544                                                   | 802                                                     | 2.24                  | 35                                                      | 63                             | <sup>h</sup>                                                                 |
| 13    | Al(50)-M41-[1.44]    | 8.8             | 0.36                             | 47        | 949                                                    | 447                                                   | 761                                                     | 2.16                  | 29                                                      | 58                             | <sup>h</sup>                                                                 |
| 14    | Al(50)-M41-[1.44]    | 7.6             | 0.44                             | 55        | 875                                                    | 499                                                   | 655                                                     | 2.08                  | 28                                                      | 57                             | 0.53                                                                         |
| 15    | Al(40)-M41-[1.44]    | 8.8             | 0.42                             | 35        | 900                                                    | 433                                                   | 604                                                     | 2.24                  | 30                                                      | 73                             | <sup>h</sup>                                                                 |
| 16    | Al(30)-M41-[1.44]    | 7.6             | 0.42                             | 28        | 888                                                    | 390                                                   | 587                                                     | 2.16                  | 30                                                      | 61                             | 0.64                                                                         |
| 17    | Al(30)-M41-[1.44]    | 6.8             | 0.48                             | 29        | 776                                                    | 359                                                   | 527                                                     | 2.08                  | 26                                                      | 58                             | <sup>h</sup>                                                                 |
| 18    | Al(15)-M41-[1.44]    | 3.7             | 0.39                             | 30        | 900                                                    | 666                                                   | 838                                                     | 2.32                  | 28                                                      | 91                             | 0.60                                                                         |
| 19    | Al(15)-M41-[1.44]    | 3.3             | 0.48                             | 30        | 838                                                    | 610                                                   | 755                                                     | 2.30                  | 22                                                      | 84                             | <sup>h</sup>                                                                 |
| 20    | Al(15)-M41-[1.44]    | 3.2             | 0.44                             | 28        | 939                                                    | 641                                                   | 806                                                     | 2.16                  | 27                                                      | 88                             | 0.64                                                                         |
| 21    | Al(5)-M41-[1.44]     | 3.2             | 0.38                             | 32        | 1043                                                   | 619                                                   | 977                                                     | 2.16                  | 29                                                      | 89                             | 0.65                                                                         |
| 22    | Al(5)-M41-[1.44]     | 2.9             | 0.54                             | 23        | 1038                                                   | 600                                                   | 956                                                     | 2.30                  | 29                                                      | 85                             | <sup>h</sup>                                                                 |
| 23    | Al(5)-M41-[1.44]     | 2.8             | 0.51                             | 24        | 1090                                                   | 631                                                   | 992                                                     | 2.16                  | 34                                                      | 87                             | 0.63                                                                         |
| 24    | Al(30)-M41-[1.44]-pH | 3.1             | 0.24                             | 52        | 978                                                    | 659                                                   | 949                                                     | 2.32                  | 29                                                      | 72                             | 0.50                                                                         |
| 25    | Al(30)-M41-[1.44]-pH | 3.0             | 0.27                             | 60        | 859                                                    | 596                                                   | 820                                                     | 2.18                  | 39                                                      | 62                             | 0.41                                                                         |
| 26    | Al(30)-M41-[1.44]-pH | 2.9             | 0.32                             | 49        | 896                                                    | 637                                                   | 868                                                     | 2.20                  | 30                                                      | 56                             | 0.49                                                                         |
| 27    | Al(30)-M41-[1.44]-pH | 2.8             | 0.19                             | 65        | 862                                                    | 500                                                   | 817                                                     | 1.96                  | 26                                                      | 73                             | 0.85                                                                         |

<sup>a</sup>Numbers in the parentheses indicate initial Si/Al atomic ratios and those in the square brackets initial C<sub>12</sub>H<sub>25</sub>NMe<sub>3</sub>Br/SiO<sub>2</sub> molar ratios. <sup>b</sup>pH Values of TIE solution. <sup>c</sup>Calculated from the difference between S<sub>BET</sub> and external surface area determined by t-plot method. <sup>d</sup>Estimated from the N<sub>2</sub> desorption branch with Barrett-Joyner-Halenda (BJH) method. The values estimated from the adsorption isotherms were almost the same as those listed in the table within the errors of 0.1 nm. <sup>e</sup>Relative intensities of X-ray (100) diffraction. <sup>f</sup>Reaction conditions: Al-M41 50 mg, **3b** 1.0 mmol, **1b** 1.0 mmol, **4a** 0.50 mmol, octane 1.0 mL, 388 K, 10 h. <sup>g</sup>Calculated from the <sup>27</sup>Al NMR spectra and the peak area ratios of AlO<sub>4</sub> to (AlO<sub>4</sub>+AlO<sub>6</sub>). <sup>h</sup>Not determined.

## 8. References

- S1 W. R. Moser, *J. Am. Chem. Soc.* 1969, **91**, 1135.  
S2 R. Mokaya, W. Jones, *Chem. Commun.* 1997, 2185.  
S3 A. Ortlar, M. Wark, G. Schulz, E. Kloff, J. Rathouský, A. Zukal *Stud. Surf. Sci. Catal.* 1998, **117**, 357.  
S4 Y. Oumi, H. Takagi, S. Sumiya, R. Mizuno, T. Uozumi, T. Sano, *Micro. Mesopore. Mater.* 2001, **44-45**, 267.  
S5 T. Abe, Y. Tachibana, T. Uematsu, M. Iwamoto, *J. Chem. Soc., Chem. Commun.* 1995, 1617.  
S6 C. Blanco, C. Pesquera, F. González *Stud. Surf. Sci. Catal.* 2004, **154**, 432.  
S7 C. Perego, S. Amarilli, A. Carati, C. Flego, G. Pazzuconi, C. Rizzo, G. Bellussi *Micro. Mesopore. Mater.* 1999, **27**, 345.  
S8 S. Biz, M. G. White *Micro. Mesopore. Mater.* 2000, **40**, 159.  
S9 M. Iwamoto, Y. Tanaka, *Catal. Surv. Jpn.* 2001, **5**, 25.  
S10 H. Murata, H. Ishitani, M. Iwamoto *Org. Biomolar. Chem.* 2010, **8**, 1202.  
S11 B. S. Balaji, B. M. Chanda *Tetrahedron* 1998, **54**, 13237.
